# Supplementary material for: Flyrock risk assessment in blasting operations
Source: Research Square preprint supplement (doi:10.21203/rs.3.rs-2370672/v1), 2022-12-15
Supplement: Supplementary file 1 [file 92a1988d59da5c6f43af7aa9.docx]

Table 1): Scoring based on the characteristics of experts (Renjith et al, 2010)

| Row | Condition | Classification | Score |
| --- | --- | --- | --- |
| 1 | Title | Director, Deputy | 4 |
| Inspector, Assistant Manager, Controller | 3 |
| Workshop manager, foreman | 2 |
| Operator | 1 |
| 2 | Experience (Year) | ≥ 30 | 4 |
| 20 – 30 | 3 |
| 10 – 20 | 2 |
| 5 - 10 | 1 |
| 3 | education | P.H.D | 5 |
| Expert and Master | 4 |
| Diploma | 3 |
| Has a technical degree | 2 |
| High school | 1 |
| 4 | Age (Year) | ≥ 50 | 4 |
| 40 – 50 | 3 |
| 30 – 40 | 2 |
| ≤ 30 | 1 |

Table (2): The weight of linguistic variables in quantifying the opinion of experts (Lavassani et al, 2015), (Shulei Shi et al, 2018)

| Language variable | Weight of language terms | | | |
| --- | --- | --- | --- | --- |
| Very low (VL) | 0.2 | 0.1 | 0 | 0 |
| Low (L) | 0.4 | 0.25 | 0.25 | 0.1 |
| Medium (M) | 0.7 | 0.5 | 0.5 | 0.3 |
| High (H) | 0.9 | 0.75 | 0.75 | 0.6 |
| Very High (VH) | 1 | 1 | 0.9 | 0.8 |

Table (3): Expert Questionnaire

|  | | | | parameters | | Nonsignificant  (L) | No Importance  (VL) | Medium importance  (M) | | Medium importance  (H) | Medium importance  (VH) |
| --- | --- | --- | --- | --- | --- | --- | --- | --- | --- | --- | --- |
| Factors affecting the parameters after closing the explosion circuit | Fly rock | Design mistake |  | 1 | Improper delay time |  |  | |  |  |  |
| 2 | Improper arrangement of explosions |  |  | |  |  |  |
| 3 | Low Amount of spacing |  |  | |  |  |  |
| 4 | Low Amount of burden |  |  | |  |  |  |
| 5 | sub drilling |  |  | |  |  |  |
| 6 | Large diameter of the hole |  |  | |  |  |  |
| 7 | Low Stemming length |  |  | |  |  |  |
| 8 | Low Hole length |  |  | |  |  |  |
| 9 | Improper selection of explosives |  |  | |  |  |  |
| 10 | Improper slope of the hole |  |  | |  |  |  |
| 11 | Incorrect estimation of natural effects |  |  | |  |  |  |
| Operational mistake |  | 12 | Spending quality |  |  | |  |  |  |
| 13 | Type of drilling machine |  |  | |  |  |  |
| Human mistake | 14 | Failure to hold retraining courses |  |  | |  |  |  |
| 15 | Lack of effective accountability and monitoring |  |  | |  |  |  |
| 16 | Inexperience |  |  | |  |  |  |
| 17 | Unmotivated |  |  | |  |  |  |
| Unpredictable natural effects mistake | 18 | Long working hours (fatigue) |  |  | |  |  |  |
| 19 | Lack of work conscience |  |  | |  |  |  |
|  | 20 | Mental preoccupation |  |  | |  |  |  |
| 21 | unpredictable |  |  | |  |  |  |
| 22 | time limit |  |  | |  |  |  |
| 23 | Lack of access to facilities and equipment |  |  | |  |  |  |

Table (4): Scoring based on the characteristics of experts

| Row | Title | Education | Experience | Weighted index | Age | The coefficient of importance of each expert |
| --- | --- | --- | --- | --- | --- | --- |
| 1 | (Explosion Expert) | Associate Degree | 15 - 11 | 8 | 40 – 30 | 0.0833 |
| 2 | Responsible for the blast team | Associate Degree | 25 - 21 | 10 | 50 – 40 | 0.1042 |
| 3 | Explosion Expert) | Associate Degree | 20 - 16 | 8 | 40 – 30 | 0.0833 |
| 4 | Explosion Expert) | Associate Degree | 15 - 11 | 8 | 40 – 30 | 0.0833 |
| 5 | Explosion Expert) | Associate Degree | 20 - 16 | 9 | 50 – 40 | 0.0937 |
| 6 | Explosion Expert) | diploma | 25 - 21 | 9 | 50 – 40 | 0.0937 |
| 7 | Responsible for the blast team | Masters | 30 < | 14 | 50 < | 0.1458 |
| 8 | Technical Office Engineer | MSc | 15 - 11 | 11 | 40 – 30 | 0.1145 |
| 9 | Explosion Expert) | Associate Degree | 20 - 16 | 9 | 40 – 30 | 0.0937 |
| 10 | Head of Executive Office (Supervision) | MSc | 10 – 6 | 10 | 40 – 30 | 0.1042 |

Table (5): Experts' answers to the questions of the basic events regarding the probability rate in the form of linguistic variables

| Top event | Intermediate event | Expert 1 | Expert 2 | Expert 3 | Expert 4 | Expert 5 | Expert 6 | Expert 7 | Expert 8 | Expert 9 | Expert 10 |
| --- | --- | --- | --- | --- | --- | --- | --- | --- | --- | --- | --- |
| Fly rock | Improper delay time | H | H | H | VH | VH | VH | VH | VH | H | M |
| Improper arrangement of explosions | VH | H | H | VH | VH | VH | H | H | H | M |
| Low Amount of spacing | H | VH | M | VH | VH | VH | H | VH | M | H |
| Low Amount of burden | H | VH | H | H | H | H | VH | VH | L | L |
| sub drilling | M | VH | M | VH | VH | VH | M | VL | L | L |
| Large diameter of the hole | M | VH | M | VH | VH | VH | H | H | M | M |
| Low Stemming length | H | H | L | H | H | H | VH | VH | L | L |
| Low Hole length | H | M | M | H | H | H | H | M | L | H |
| Improper selection of explosives | H | H | M | VH | H | VH | VH | H | M | H |
| Improper slope of the hole | H | H | M | H | VH | H | M | H | H | H |
| Incorrect estimation of natural effects | M | H | M | H | VH | H | L | M | H | H |
| Spending quality | VH | VH | H | VH | VH | VH | M | H | VH | H |
| Type of drilling machine | L | M | L | H | H | H | VL | VL | VH | M |
| Failure to hold retraining courses | H | M | M | H | VH | H | L | M | H | H |
| Lack of effective accountability and monitoring | M | M | M | VH | H | VH | L | H | L | H |
| Inexperience | L | H | H | H | VH | H | M | H | H | M |
| Unmotivated | M | M | VH | VH | VH | VH | L | H | M | M |
| Long working hours (fatigue) | M | H | VH | VH | VH | VH | M | H | VH | M |
| Lack of work conscience | M | H | H | VH | VH | VH | M | H | VH | M |
| Mental preoccupation | L | M | H | VH | VH | VH | M | H | VH | M |
| unpredictable | L | M | M | H | VH | VH | M | VH | H | L |
| time limit | M | H | H | VH | VH | H | M | VL | H | M |
| Lack of access to facilities and equipment | H | H | H | H | VH | H | M | L | H | L |

Table (6): Probability rate of major fly rock events in firefighting operations

| row | Basic event | Event probability rate |
| --- | --- | --- |
| 1 | Improper delay time | 0.0392 |
| 2 | Improper arrangement of explosions | 0.0318 |
| 3 | Low Amount of spacing | 0.0328 |
| 4 | Low Amount of burden | 0.0199 |
| 5 | sub drilling | 0.0075 |
| 6 | Large diameter of the hole | 0.0212 |
| 7 | Low Stemming length | 0.0136 |
| 8 | Low Hole length | 0.0117 |
| 9 | Improper selection of explosives | 0.0271 |
| 10 | Improper slope of the hole | 0.0194 |
| 11 | Incorrect estimation of natural effects | 0.0113 |
| 12 | Spending quality | 0.0374 |
| 13 | Type of drilling machine | 0.0036 |
| 14 | Failure to hold retraining courses | 0.0109 |
| 15 | Lack of effective accountability and monitoring | 0.0093 |
| 16 | Inexperience | 0.0144 |
| 17 | Unmotivated | 0.0126 |
| 18 | Long working hours (fatigue) | 0.0242 |
| 19 | Lack of work conscience | 0.0220 |
| 20 | Mental preoccupation | 0.0163 |
| 21 | Unpredictable | 0.0114 |
| 22 | time limit | 0.0111 |
| 23 | Lack of access to facilities and equipment | 0.0111 |

Table (7): Intermediate and top events of fly rock probability

|  |  |  |  | 0.4907 |  |  |  |  |  |  |
| --- | --- | --- | --- | --- | --- | --- | --- | --- | --- | --- |
|  |  |  |  |  |  |  |  |  |  |  |
| 0.2125 |  |  |  | 0.2457 |  |  |  |  | 0.1426 |  |
|  |  |  |  |  |  |  |  |  |  |  |
|  |  | 0.1132 |  |  | 0.1164 | 0.0374 |  | 0.0221 | 0.0114 | 0.1132 |
| 0.03921 |  |  |  |  |  |  |  |  |  |  |
| 0.03183 |  |  |  |  |  |  |  |  |  |  |
| 0.0329 | 0.0201 | 0.0144 | 0.0817 |  | 0.0036 | 0.1132 | 0.0201 | 0.0144 | 0.0817 |  |
| 0.02 |  |  |  |  |  |  |  |  |  |  |
| 0.0075 |  |  |  | 0.0201 | 0.0144 | 0.0817 |  |  |  |  |
| 0.0212 |  |  |  |  |  |  | 0.0126 |  | 0.0109 | 0.0111 |
| 0.0137 | 0.0126 |  | 0.0109 | 0.0126 |  | 0.0109 | 0.0242 |  | 0.0093 | 0.0111 |
| 0.0117 | 0.0242 |  | 0.0093 | 0.0242 |  | 0.0093 | 0.0220 |  |  |  |
| 0.0271 | 0.0220 |  |  | 0.0220 |  |  | 0.0163 |  |  |  |
| 0.0194 | 0.0163 |  |  | 0.0163 |  |  | 0.0093 |  |  |  |
| 0.0113 | 0.0093 |  |  | 0.0093 |  |  |  |  |  |  |
